# Supplementary material for: Cytokeratin-positive cells in the bone marrow from patients with pancreatic, periampullary malignancy and benign pancreatic disease show no prognostic information
Source: PubMed Central journal article supplement (PMC7667773; doi:10.1186/s12885-020-07510-z), 2020-11-16
Supplement: 12885_2020_7510_MOESM1_ESM.pdf [file 12885_2020_7510_MOESM1_ESM.pdf]

## Resected cancers

## Advanced cancers

UIC

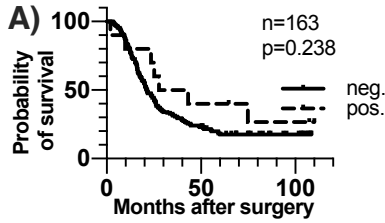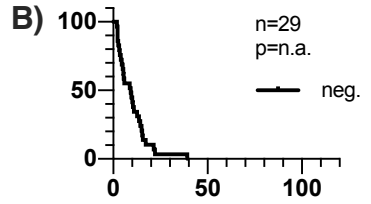

HC

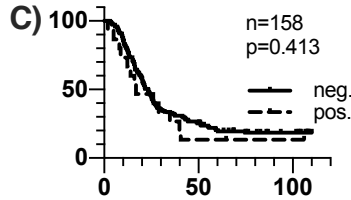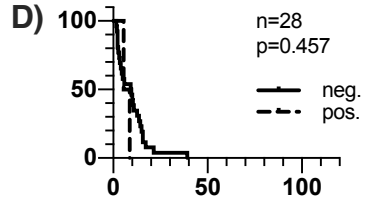

QHC

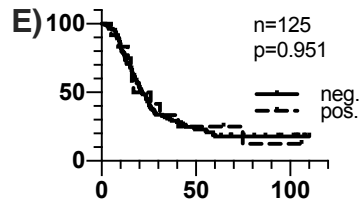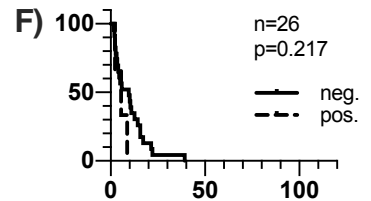

UIC

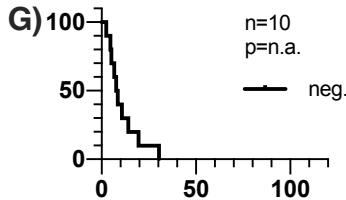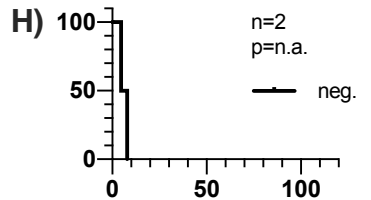

HC

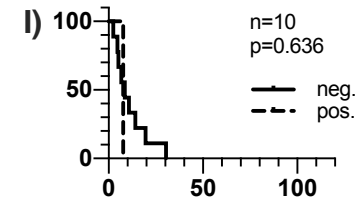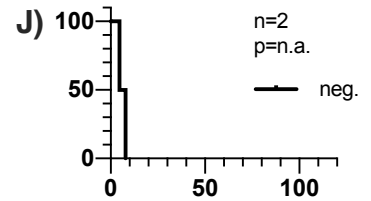

QHC

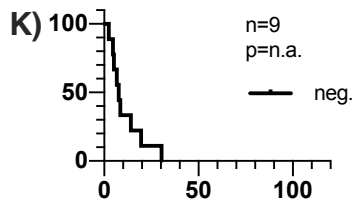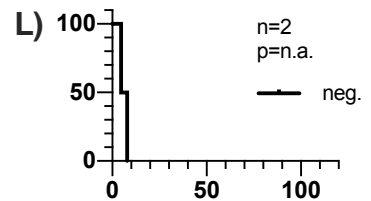

CTC-  
negative

CTC  
positive
